# Supplementary material
Source: PubMed Central journal article supplement (PMC5642286)
Supplement: NIHMS909602-supplement-SI.pdf [file NIHMS909602-supplement-SI.pdf]

# Iterative Molecular Dynamics – Rosetta Membrane Protein Structure Refinement Guided by Cryo-EM Densities

Sumudu P. Leelananda, Steffen Lindert

## Supporting Information

**Figure S1: The refinement of the 2MAW ab initio starting structure that was not manually adjusted. (a) Structure alignment; native structure (gray), manually adjusted structure (green) and the best ab initio starting structure (red). Structure overlap shows that by manually adjusting the structure a register shift was introduced that brings the structure closer to the native (b) The RMSDs of 2MAW starting structures along the flow of the iterative Rosetta-MD protocol for the 4 Å density map (c) The RMSDs of 2MAW starting structures along the flow of the iterative Rosetta-MD protocol for the 6.9 Å density map.**

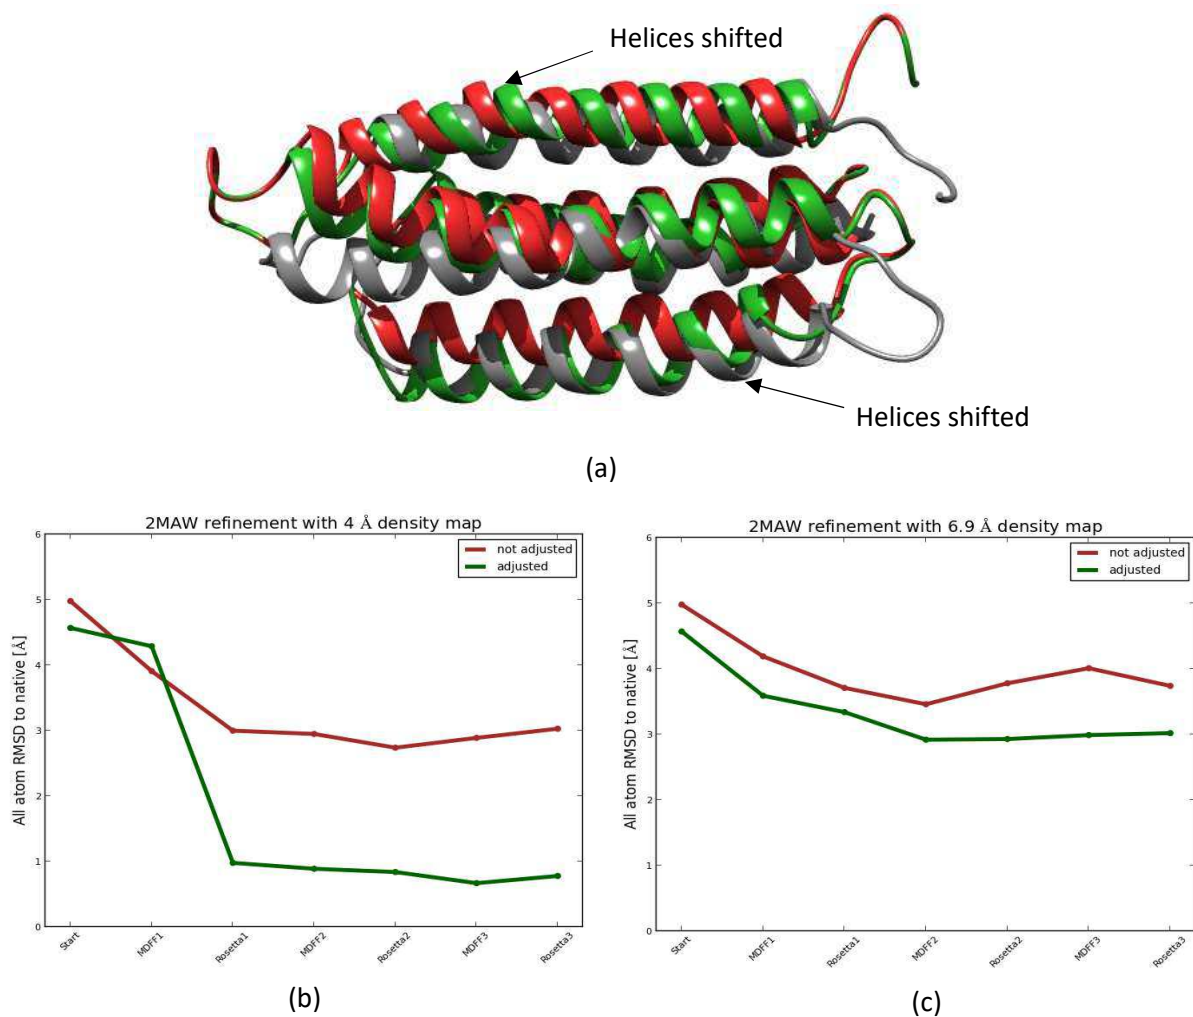

**Figure S2: Final MDFFF step simulated at 3 different gscale parameters (0.2, 0.5 and 1.0) for the membrane proteins refined with a 4 Å density map. The RMSDs of the previous Rosetta step (Rosetta2) and the subsequent Rosetta step (Rosetta3) are also shown.**

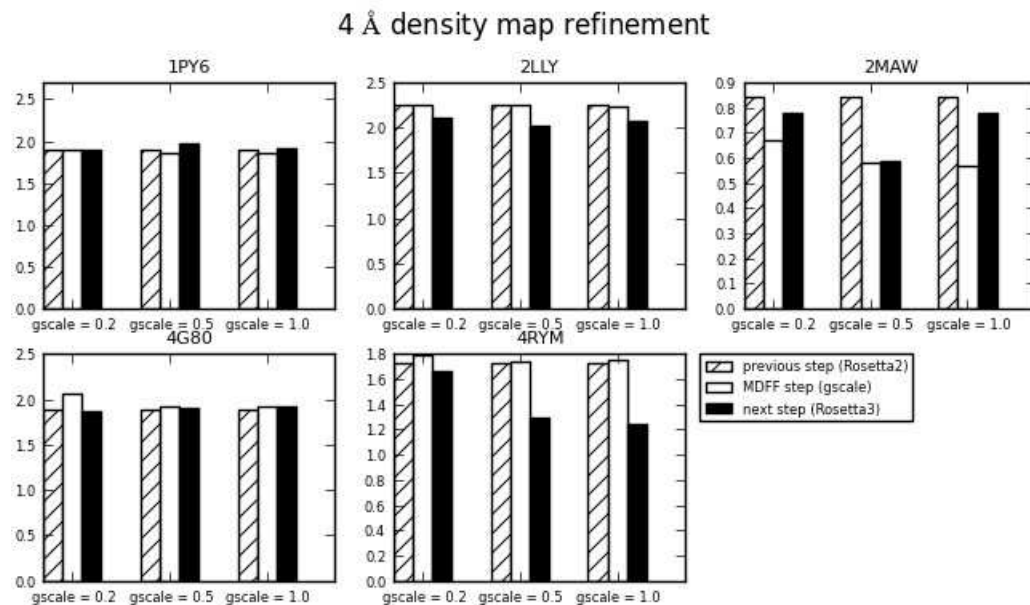

**Figure S3: Final MDFFF step simulated at 3 different gscale parameters (0.2, 0.5 and 1.0) for the membrane proteins refined with a 6.9 Å density map. The RMSDs of the previous Rosetta step (Rosetta2) and the subsequent Rosetta step (Rosetta3) are also shown.**

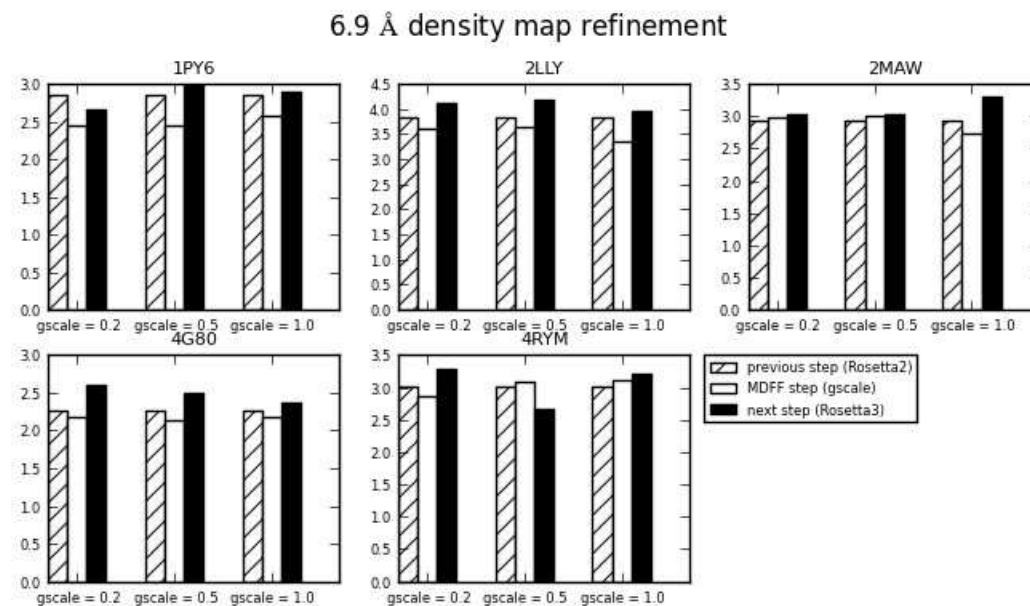

## Procedure to simulate density maps

The density maps were generated from the OPM-aligned native protein structures of each membrane protein using the pdb2vol program in the Situs package (situs.biomachina.org)<sup>1</sup>.

```
Pdb2vol native.pdb densitymap.mrc
```

The values for arguments are collected after the above command is used. One third of the target resolution was used as the voxel spacing. For the 4 Å and 6.9 Å resolution density map simulations voxel spacings of 1.33 Å and 2.3 Å were used respectively. The atoms are not mass-weighted or selected based on B-factor. Gaussian smoothing kernel was used with an amplitude of 1.

Adding noise to density maps:

Noise was introduced to density maps using BCL density protocol<sup>2</sup>.

```
bcl-apps-static.exe density:FromPDB native.pdb -resolution 6.9 -voxel_size 2.3 -kernel  
GaussianSphere -noise 0.8 -random_seed
```

## Protocol Capture

### Rosetta refinement (2016 version with talaris2014 scoring function)

```
/rosetta/main/source/bin/rosetta_scripts.linuxgccrelease -database /rosetta/main/database/ -  
in::file::s Rosetta1_start.pdb -parser::protocol xml_local_rebuilding1_mem.xml -  
parser::script_vars denswt=25 rms=1.5 reso=4.0 map=1PY6_native_4A.mrc  
testmap=1PY6_native_4A.mrc -ignore_unrecognized_res -edensity::mapreso 4.0 -  
default_max_cycles 200 -edensity::cryoem_scatterers -out::suffix _1 -crystal_refine -nstruct 1
```

### NAMD (namd-2.11)

```
run_namd melting-01.conf  
run_namd protein_fixed-02.conf
```

Generate the MDFF inputs using the tcl script:

```
last_frame_02_prepare_input.tcl
```

```
run_namd last_frame_02_MDFF-step1.namd (starting from the last frame of the previous  
NAMD simulation).
```

\*All input files, input structures, ab initio starting structures, density maps and the final refined models are included as zip file.

1. Wriggers, W., Conventions and workflows for using Situs. *Acta Crystallographica Section D: Biological Crystallography* **2012**, *68* (4), 344-351.
2. Woetzel, N.; Lindert, S.; Stewart, P. L.; Meiler, J., BCL:: EM-Fit: Rigid body fitting of atomic structures into density maps using geometric hashing and real space refinement. *Journal of structural biology* **2011**, *175* (3), 264-276.
